# Supplementary material
Source: PubMed Central journal article supplement (PMC4583822)
Supplement: NIHMS710038-supplement-Supplemental_Data.pdf [file NIHMS710038-supplement-Supplemental_Data.pdf]

## SUPPLEMENT

**eTable 1: Composite Antidepressant Score CAD. Guidelines for the CAD Scores to Measure Intensity of Antidepressant Medication Treatment (Daily Dosages) – Revised for Older Adults.**

**eTable 2: Treatment Satisfaction Scores. LS means of Patient and Caregiver Treatment Satisfaction Scores in PATH and ST at 4, 8, 12 Weeks of Treatment, Based on Mixed-Effects Models Analyses.**

**eTable 1: Composite Antidepressant Score CAD. Guidelines for the CAD Scores to Measure Intensity of Antidepressant Medication Treatment (Daily Dosages) – Revised for Older Adults.**

| <b>CAD Score</b> | <b>Nortriptyline</b><br>Pamelor | <b>Sertraline</b><br>Zoloft | <b>Bupropion</b><br>Wellbutrin | <b>Fluoxetine</b><br>Prozac<br><b>Paroxetine</b><br>Paxil<br><b>Citalopram</b><br>Celexa | <b>Venlafaxine</b><br>Effexor | <b>Escitalopram</b><br>Lexapro |
|------------------|---------------------------------|-----------------------------|--------------------------------|------------------------------------------------------------------------------------------|-------------------------------|--------------------------------|
| 0                | None                            | None                        | None                           | None                                                                                     | None                          | None                           |
| 1                | <30mg                           | <25mg                       | <100mg                         | <10mg                                                                                    | <50mg                         | <5mg                           |
| 2                | 30-49mg                         | 25-49mg                     | 100-199mg                      | 10-19mg                                                                                  | 50-75mg                       | 5-9mg                          |
| 3                | 50-80mg                         | 50-100mg                    | 200-300mg                      | 20-30mg                                                                                  | 76-150mg                      | 10-15mg                        |
| 4                | >80mg                           | >100mg                      | >300mg                         | >30mg                                                                                    | >150mg                        | >15mg                          |

| <b>CAD Score</b> | <b>Mirtazapine</b><br>Remeron | <b>Fluoxetine</b><br>Luvox | <b>Nefazodone</b><br>Serzone | <b>Duloxetine</b><br>Cymbalta |
|------------------|-------------------------------|----------------------------|------------------------------|-------------------------------|
| 0                | None                          | None                       | None                         | None                          |
| 1                | <10mg                         | <50mg                      | <150mg                       | <20mg                         |
| 2                | 10-15mg                       | 50-99mg                    | 150-250mg                    | 21-40mg                       |
| 3                | 16-30mg                       | 100-200mg                  | 251-350mg                    | 41-60mg                       |
| 4                | >30mg                         | >200mg                     | >350mg                       | 61-120mg                      |

**eTable 2: Treatment Satisfaction Scores. LS means of Patient and Caregiver Treatment Satisfaction Scores in PATH and ST at 4, 8, 12 Weeks of Treatment, Based on Mixed-Effects Models Analyses.**

|                                                                       | PATH (N=37)          |                        | ST (N=37)            |                        |
|-----------------------------------------------------------------------|----------------------|------------------------|----------------------|------------------------|
|                                                                       | PATIENT<br>Mean (SE) | CAREGIVER<br>Mean (SE) | PATIENT<br>Mean (SE) | CAREGIVER<br>Mean (SE) |
| <b>To What Extent Did Service Meet Patient's Needs? *<sup>§</sup></b> |                      |                        |                      |                        |
| <b>Week 4</b>                                                         | 3.01 (0.16)          | 3.05 (0.25)            | 3.02 (0.15)          | 3.02 (0.27)            |
| <b>Week 8</b>                                                         | 3.12 (0.13)          | 3.37 (0.21)            | 3.08 (0.13)          | 3.07 (0.24)            |
| <b>Week 12</b>                                                        | 3.23 (0.15)          | 3.68 (0.24)            | 3.13 (0.14)          | 3.13 (0.28)            |
| <b>What Was the Overall Satisfaction With Service? *<sup>§</sup></b>  |                      |                        |                      |                        |
| <b>Week 4</b>                                                         | 3.48 (0.14)          | 3.51 (0.18)            | 3.47 (0.13)          | 3.37 (0.20)            |
| <b>Week 8</b>                                                         | 3.46 (0.11)          | 3.59 (0.16)            | 3.51 (0.11)          | 3.39 (0.18)            |
| <b>Week 12</b>                                                        | 3.44 (0.13)          | 3.67 (0.18)            | 3.56 (0.12)          | 3.41 (0.21)            |
| <b>Would Patient Come Back To The Program ? *<sup>§</sup></b>         |                      |                        |                      |                        |
| <b>Week 4</b>                                                         | 3.70 (0.13)          | 3.78 (0.16)            | 3.64 (0.12)          | 3.41 (0.17)            |
| <b>Week 8</b>                                                         | 3.67 (0.11)          | 3.78 (0.15)            | 3.63 (0.11)          | 3.49 (0.16)            |
| <b>Week 12</b>                                                        | 3.65 (0.12)          | 3.79 (0.16)            | 3.63 (0.11)          | 3.57 (0.18)            |

---

\* Client Satisfaction Questionnaire;

1: To What Extent Did Service Meet Patient's Needs? (Score range 1-4: 4=Almost all needs have been met; 3=Most needs met; 2=Only a few needs met; 1=No needs met);

2: Overall Satisfaction With Service (Scores range 1-4; 4=Very satisfied; 3=Mostly satisfied; 2=Indifferent or mildly dissatisfied; 1=Quite dissatisfied);

3: Would You Come Back To The Program? (Scores range 1-4; 4=Yes, definitely; 3=Yes, I think so; 2=No, I don't think so; 1=No, definitely not).

<sup>§</sup> Mixed-effects models analysis revealed that there were no significant differences in slopes between the two treatments (treatment group x time interaction was not significant) on each CSQ item. Further, there were no significant differences between the two treatments at each time point, as shown by post-hoc analysis with Bonferroni adjustment for multiple comparisons.
